# Supplementary material for: Metal accumulation patterns in Pittsburgh, PA (United States) green infrastructure soils: road connections and legacy soil inputs
Source: Frontiers journal article supplement (doi:10.3389/fenvs.2023.1155789), 2023-07-13
Supplement: Data_Sheet_1.docx [file Data_Sheet_1.docx]

**8. Supplemental Figures**

**
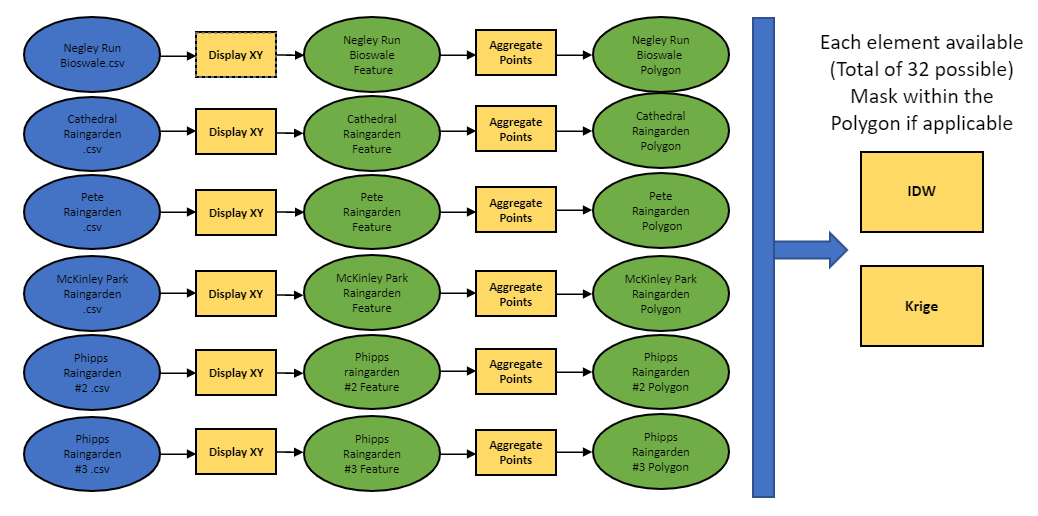
**

***Figure S1:*** *Represents the GIS workflow performed in ArcGIS Pro for each of the GI site datasets.*

**
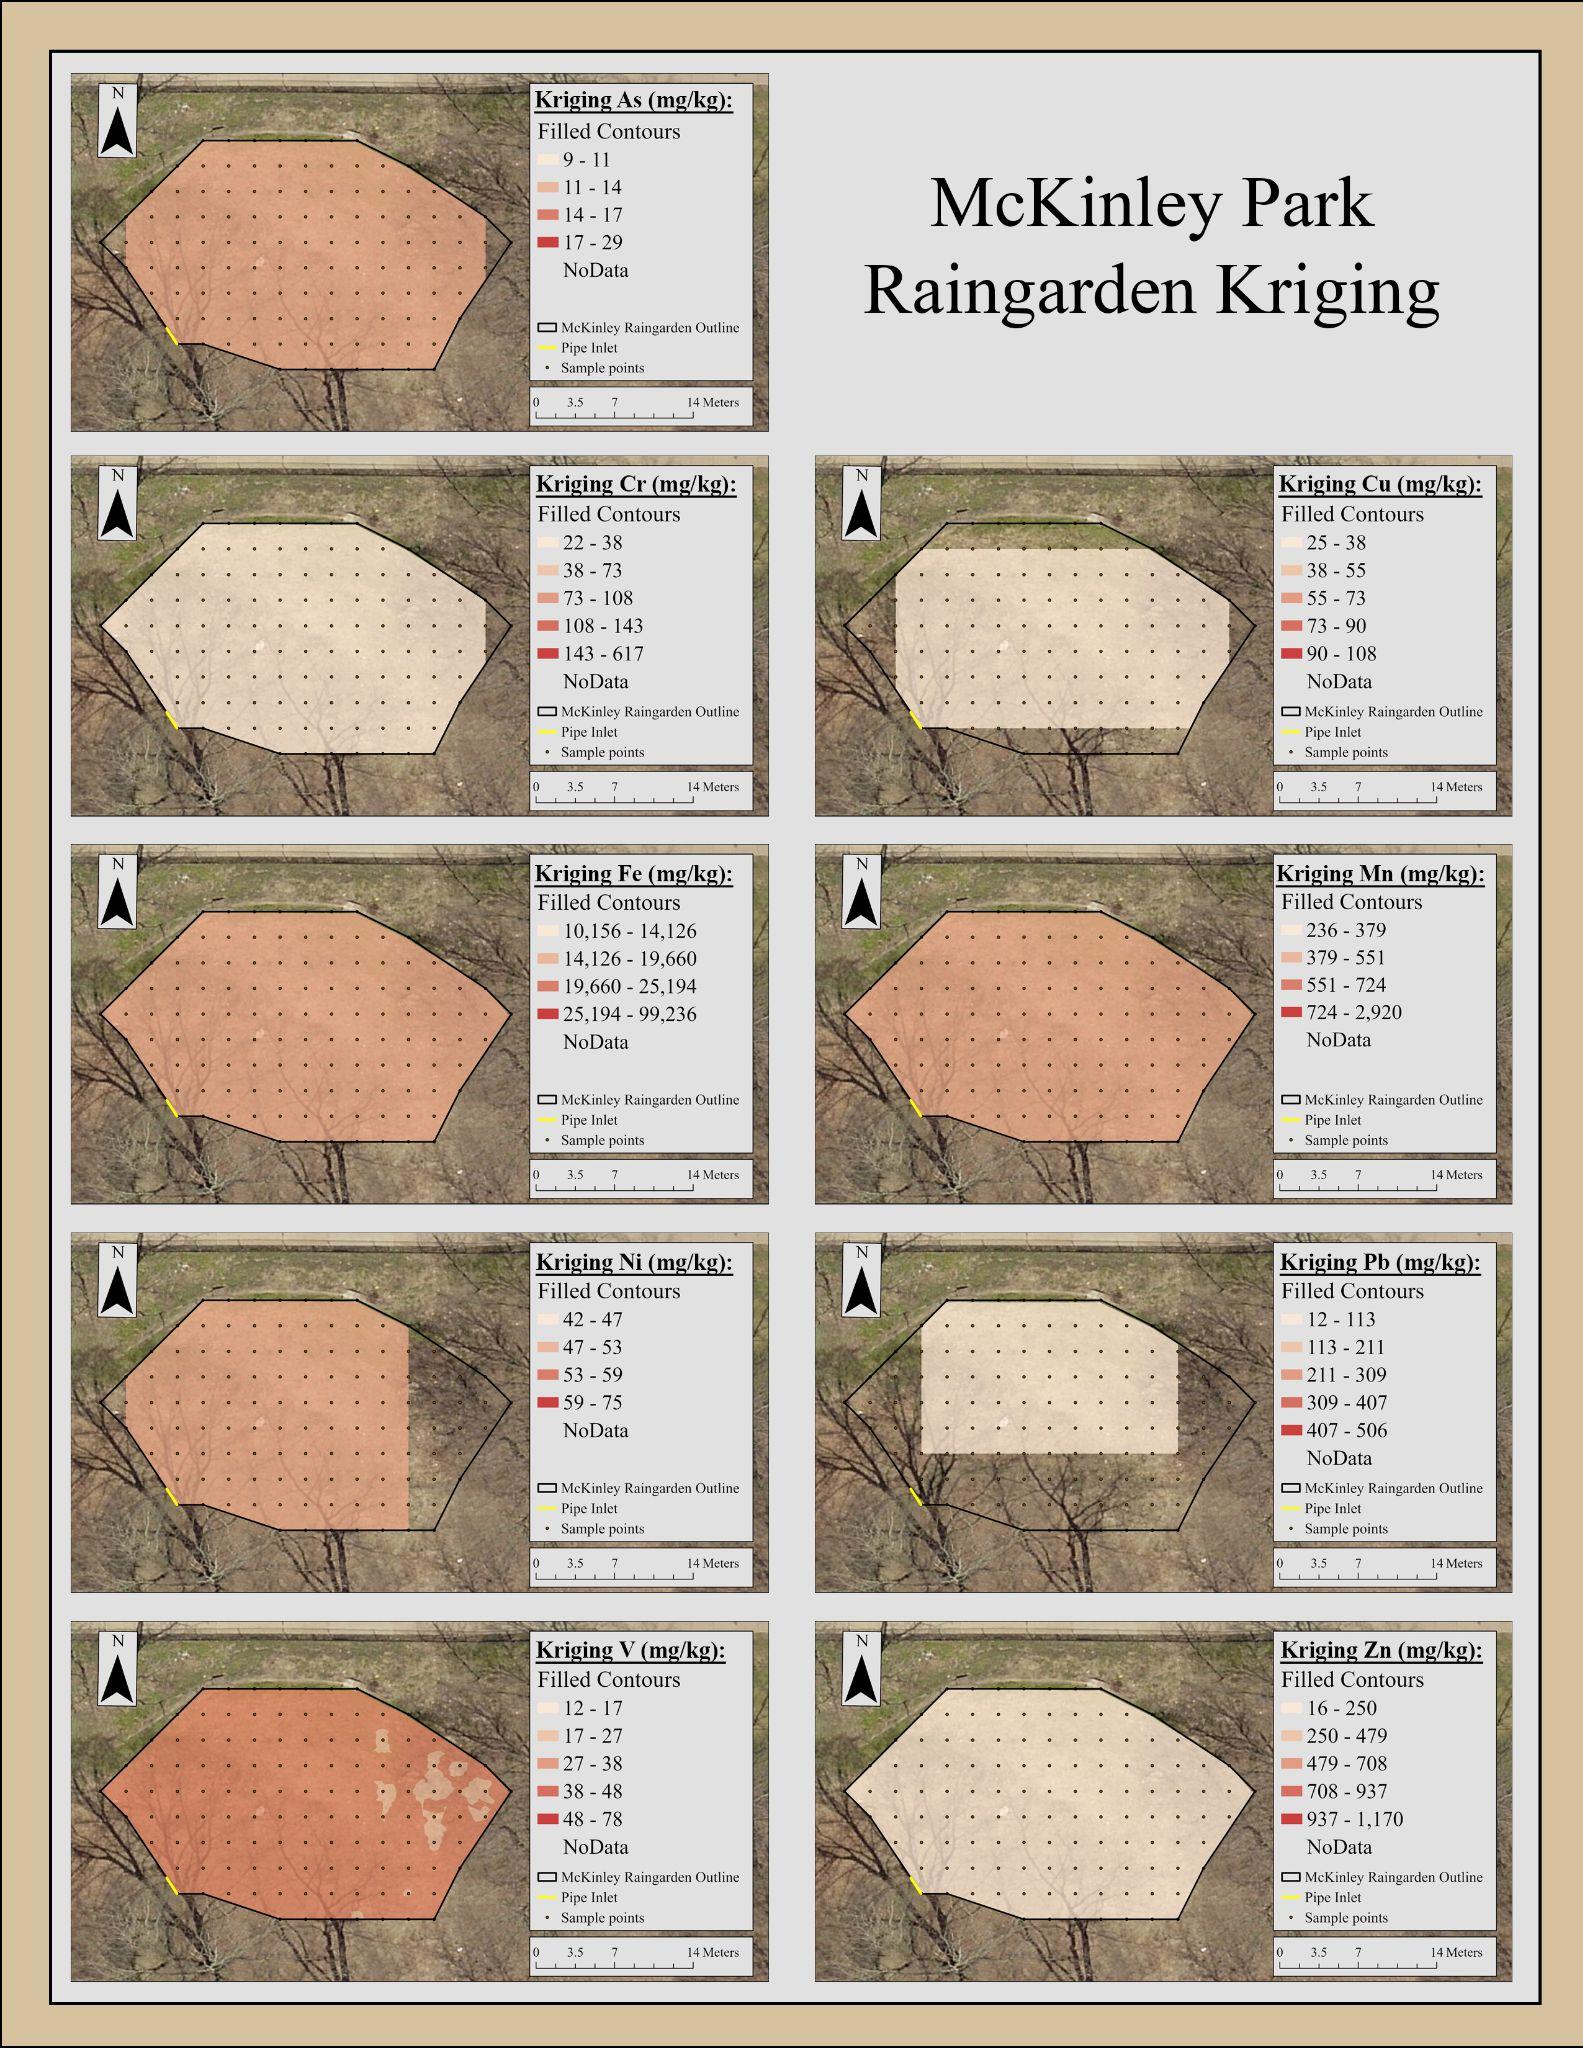
**

***Figure S2****:**A map of soil metal concentration patterns measured in the McKinley Park lower raingarden*

*
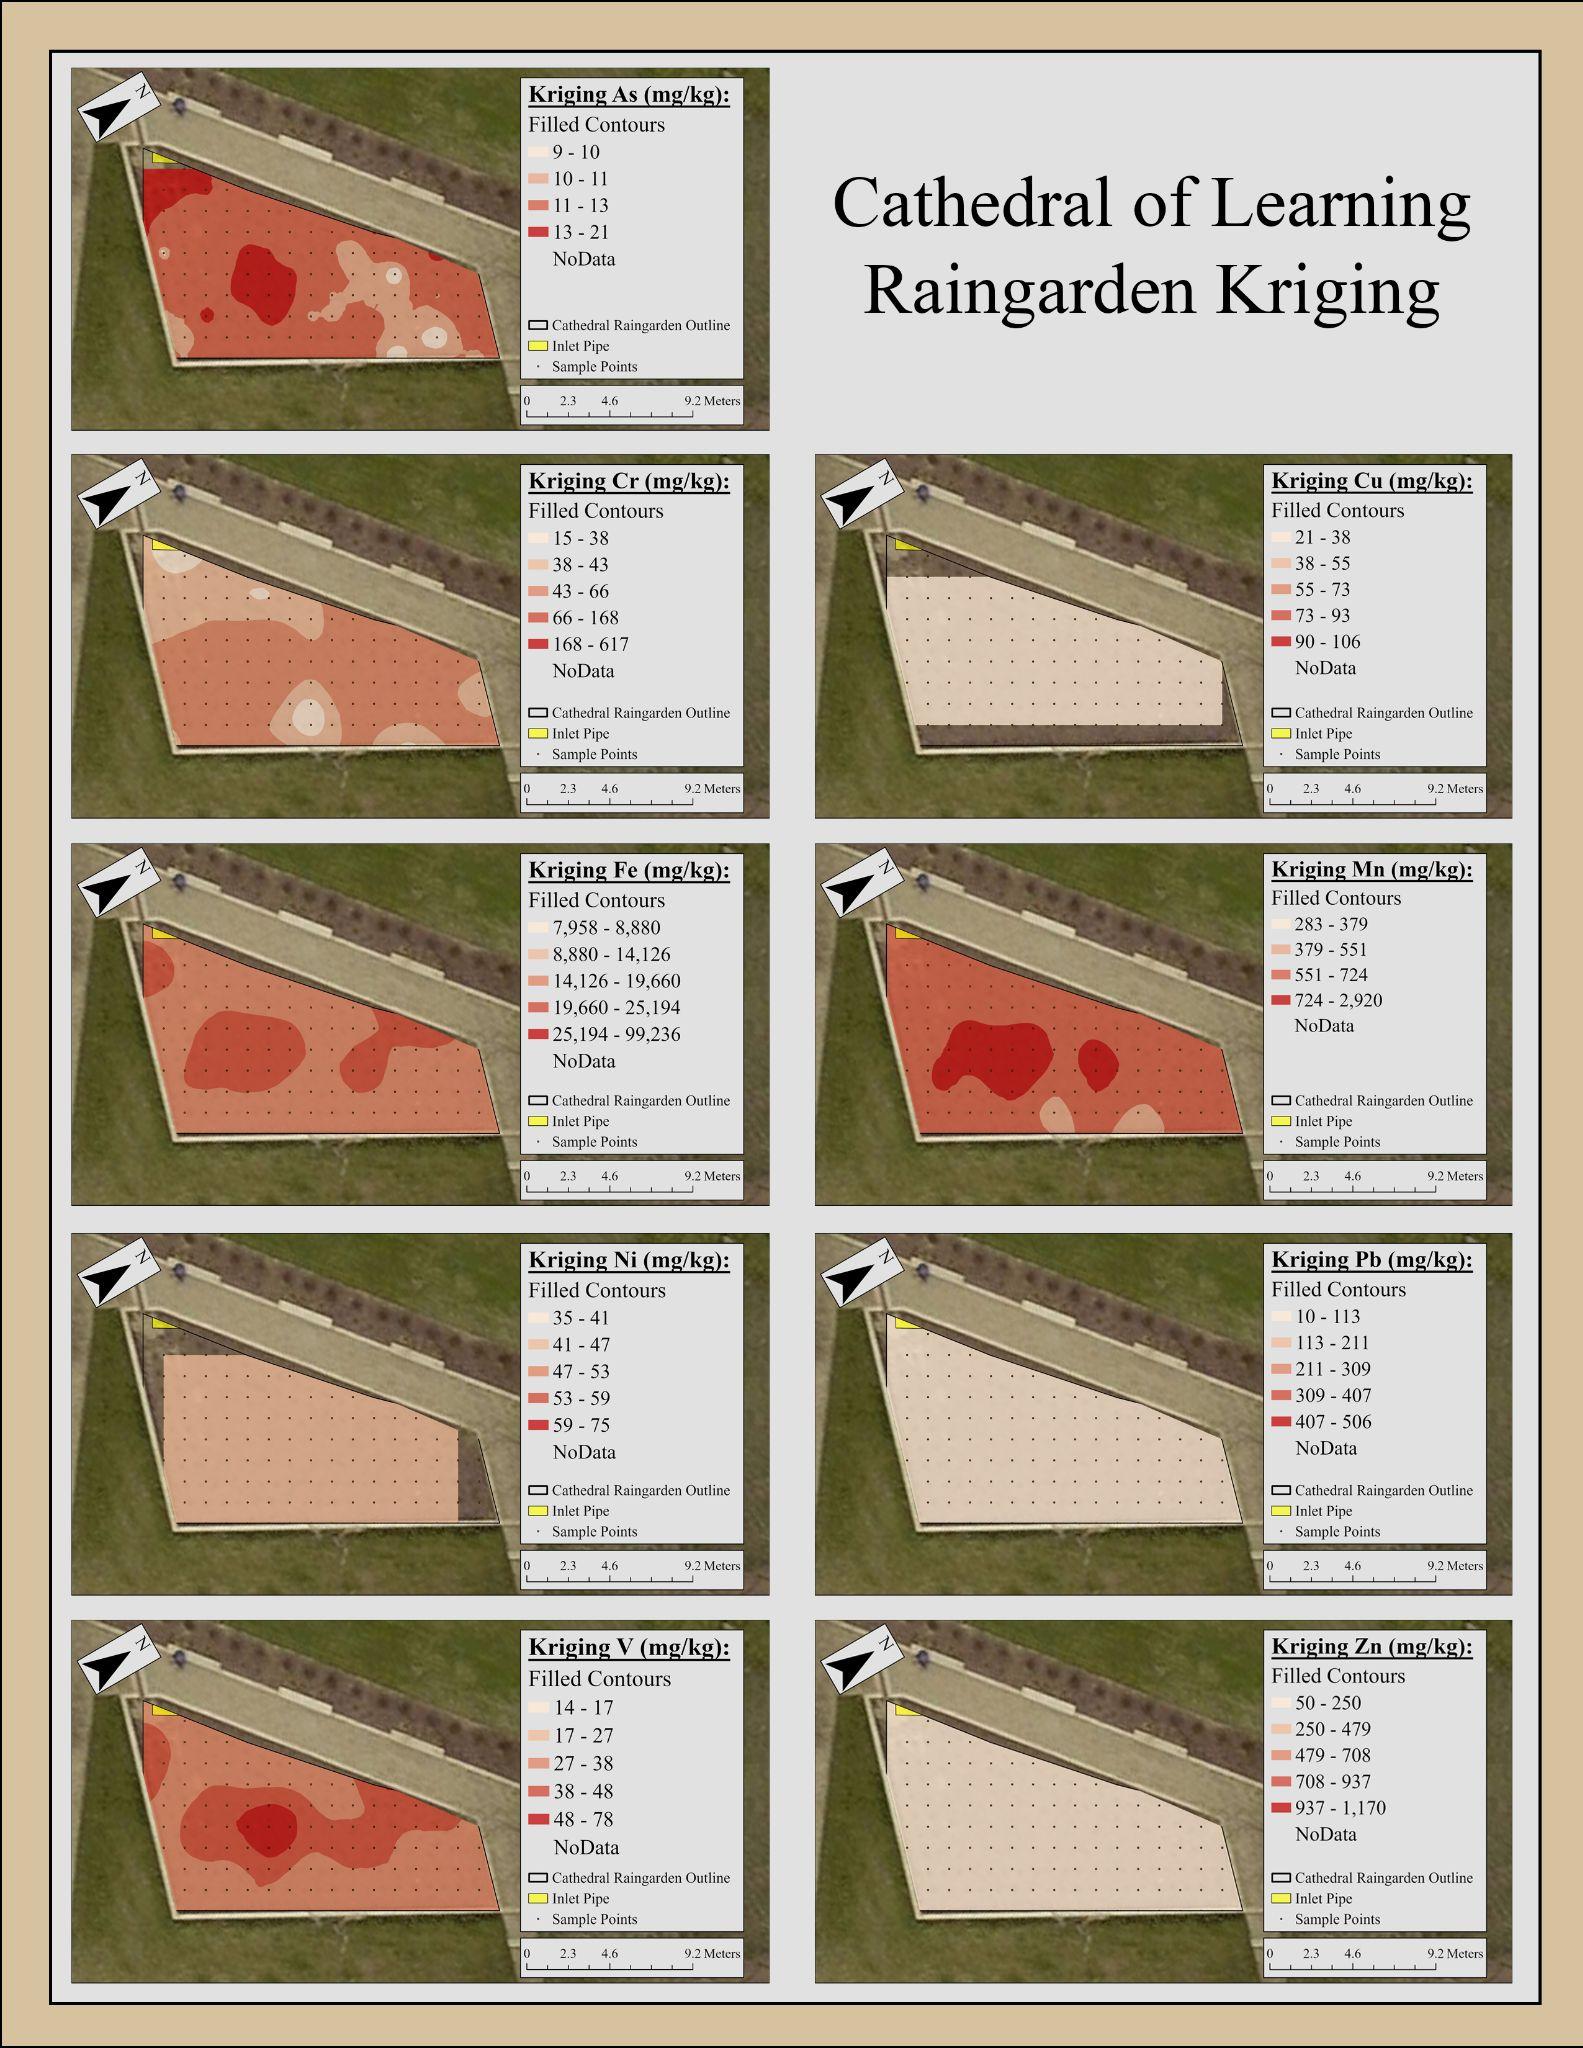
*

***Figure S3****: A map of soil metal concentration patterns measured in the Cathedral of Learning raingarden.*

*
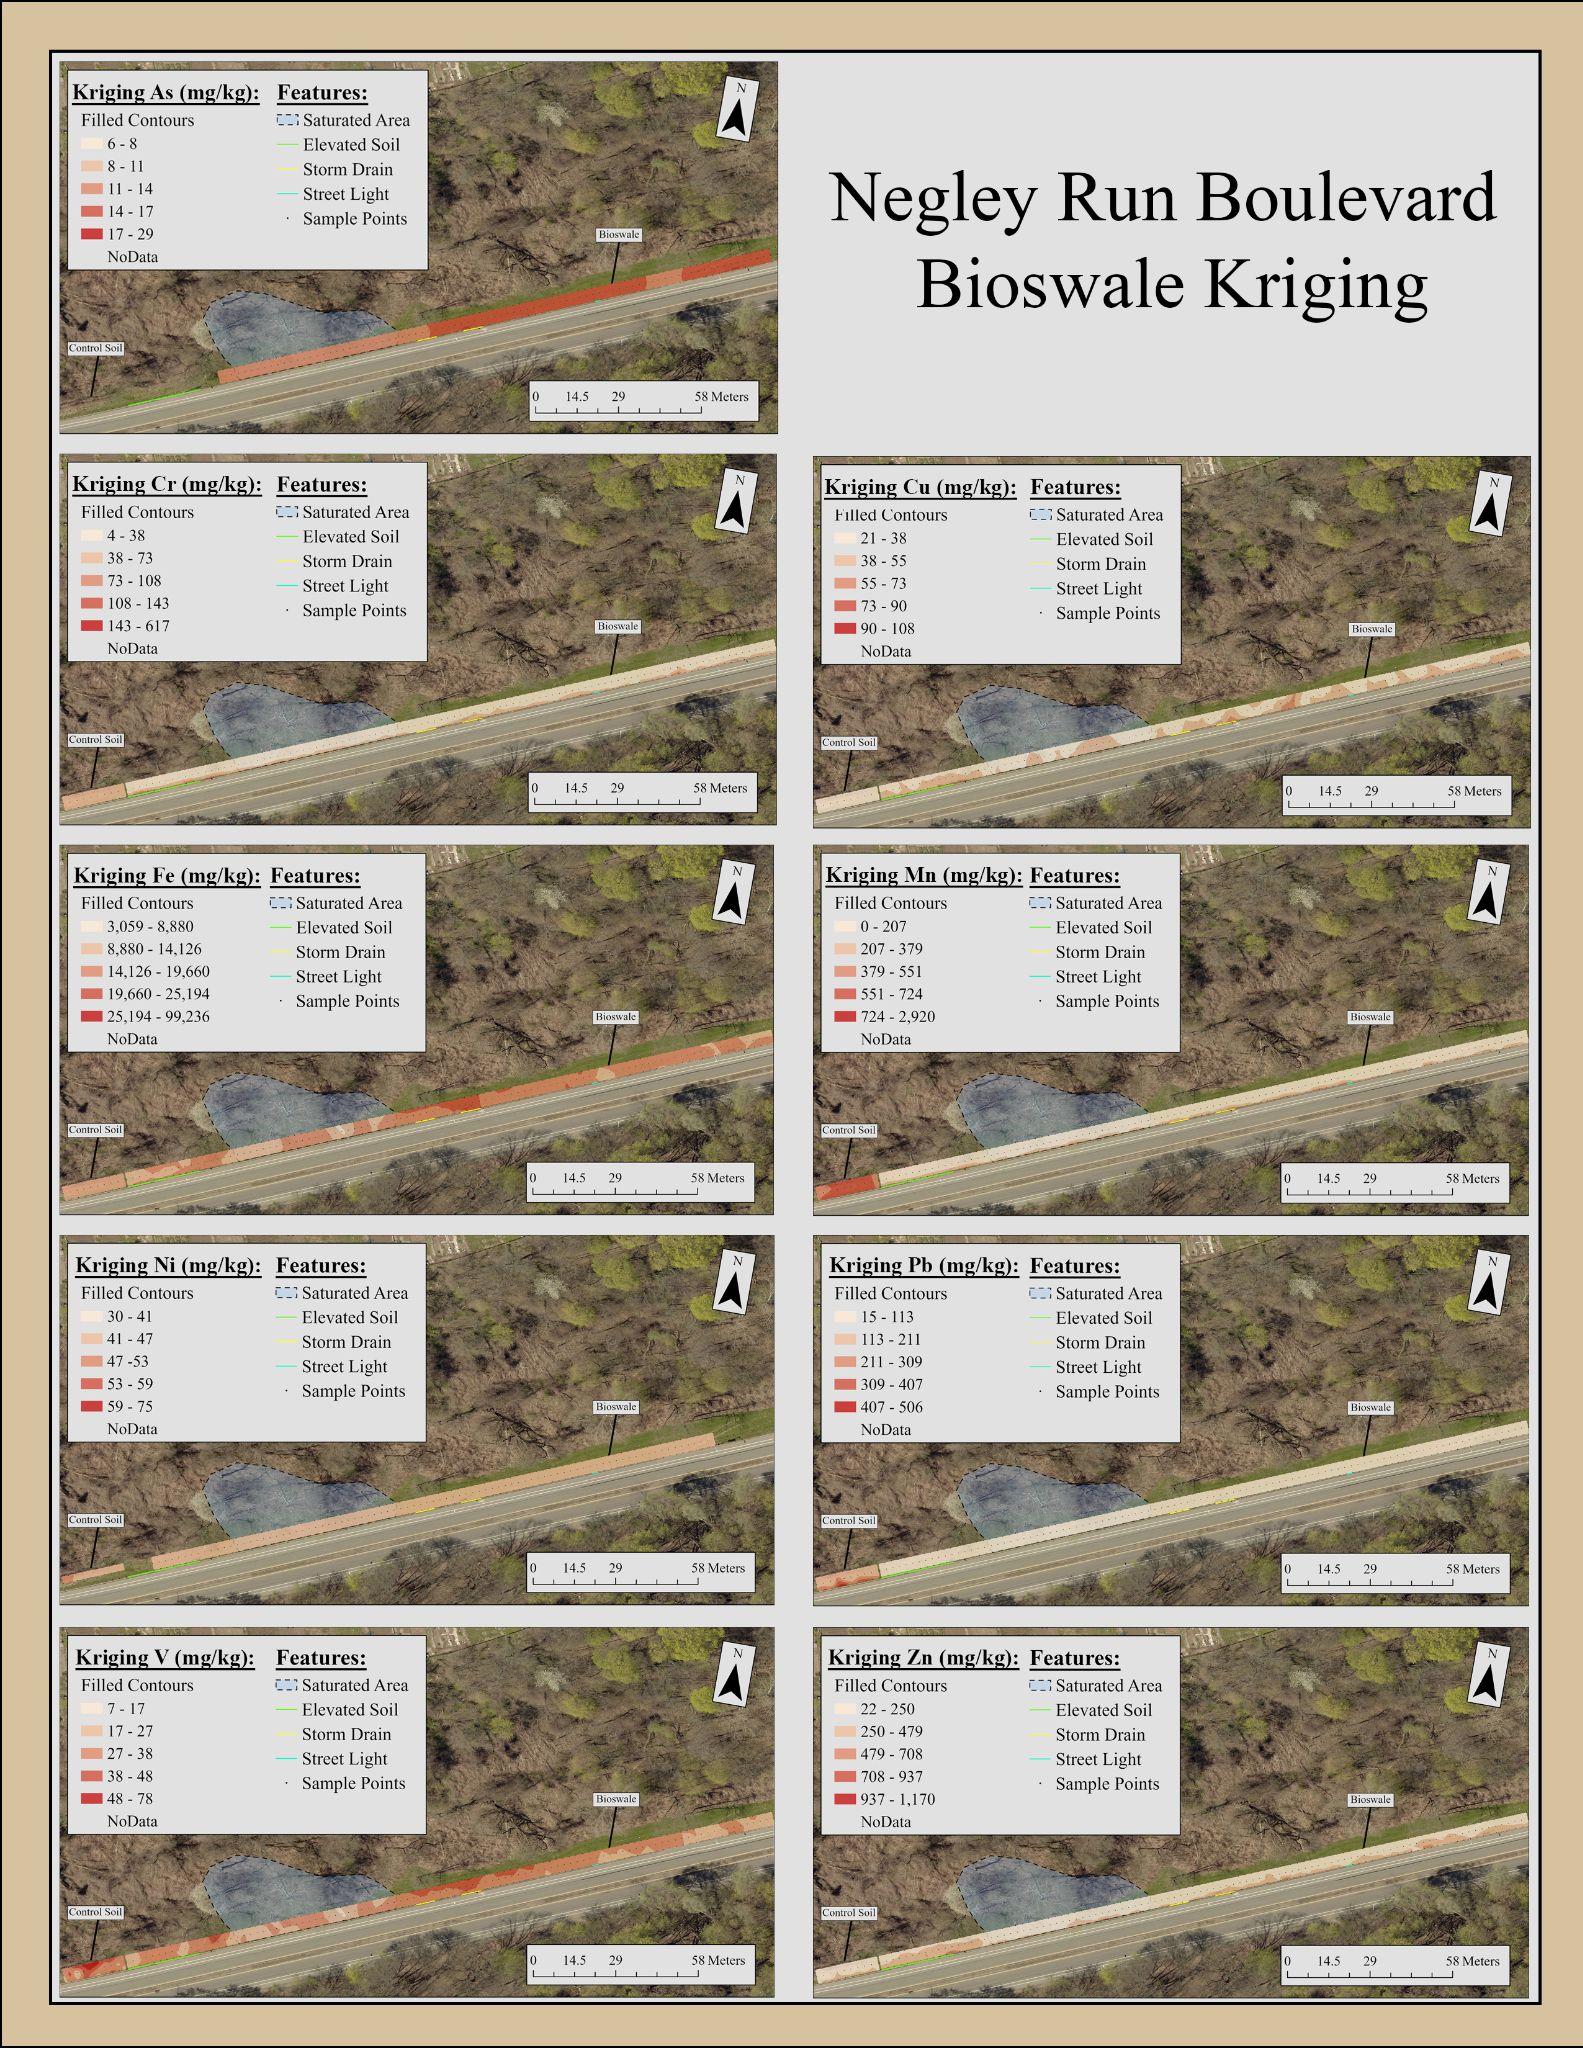
*

***Figure S4****: Maps of metal concentrations in the Negley Run Boulevard Legacy soil (left) and bioswale (right starting at the green line). Unknown hillside spring/pipe flow that saturates the swale soils is represented by the blue area with a black dashed line border. Runoff obstructions like elevated soil, storm drains, and streetlights both with concrete berms are represented by green, yellow, and cyan lines respectively.*

*
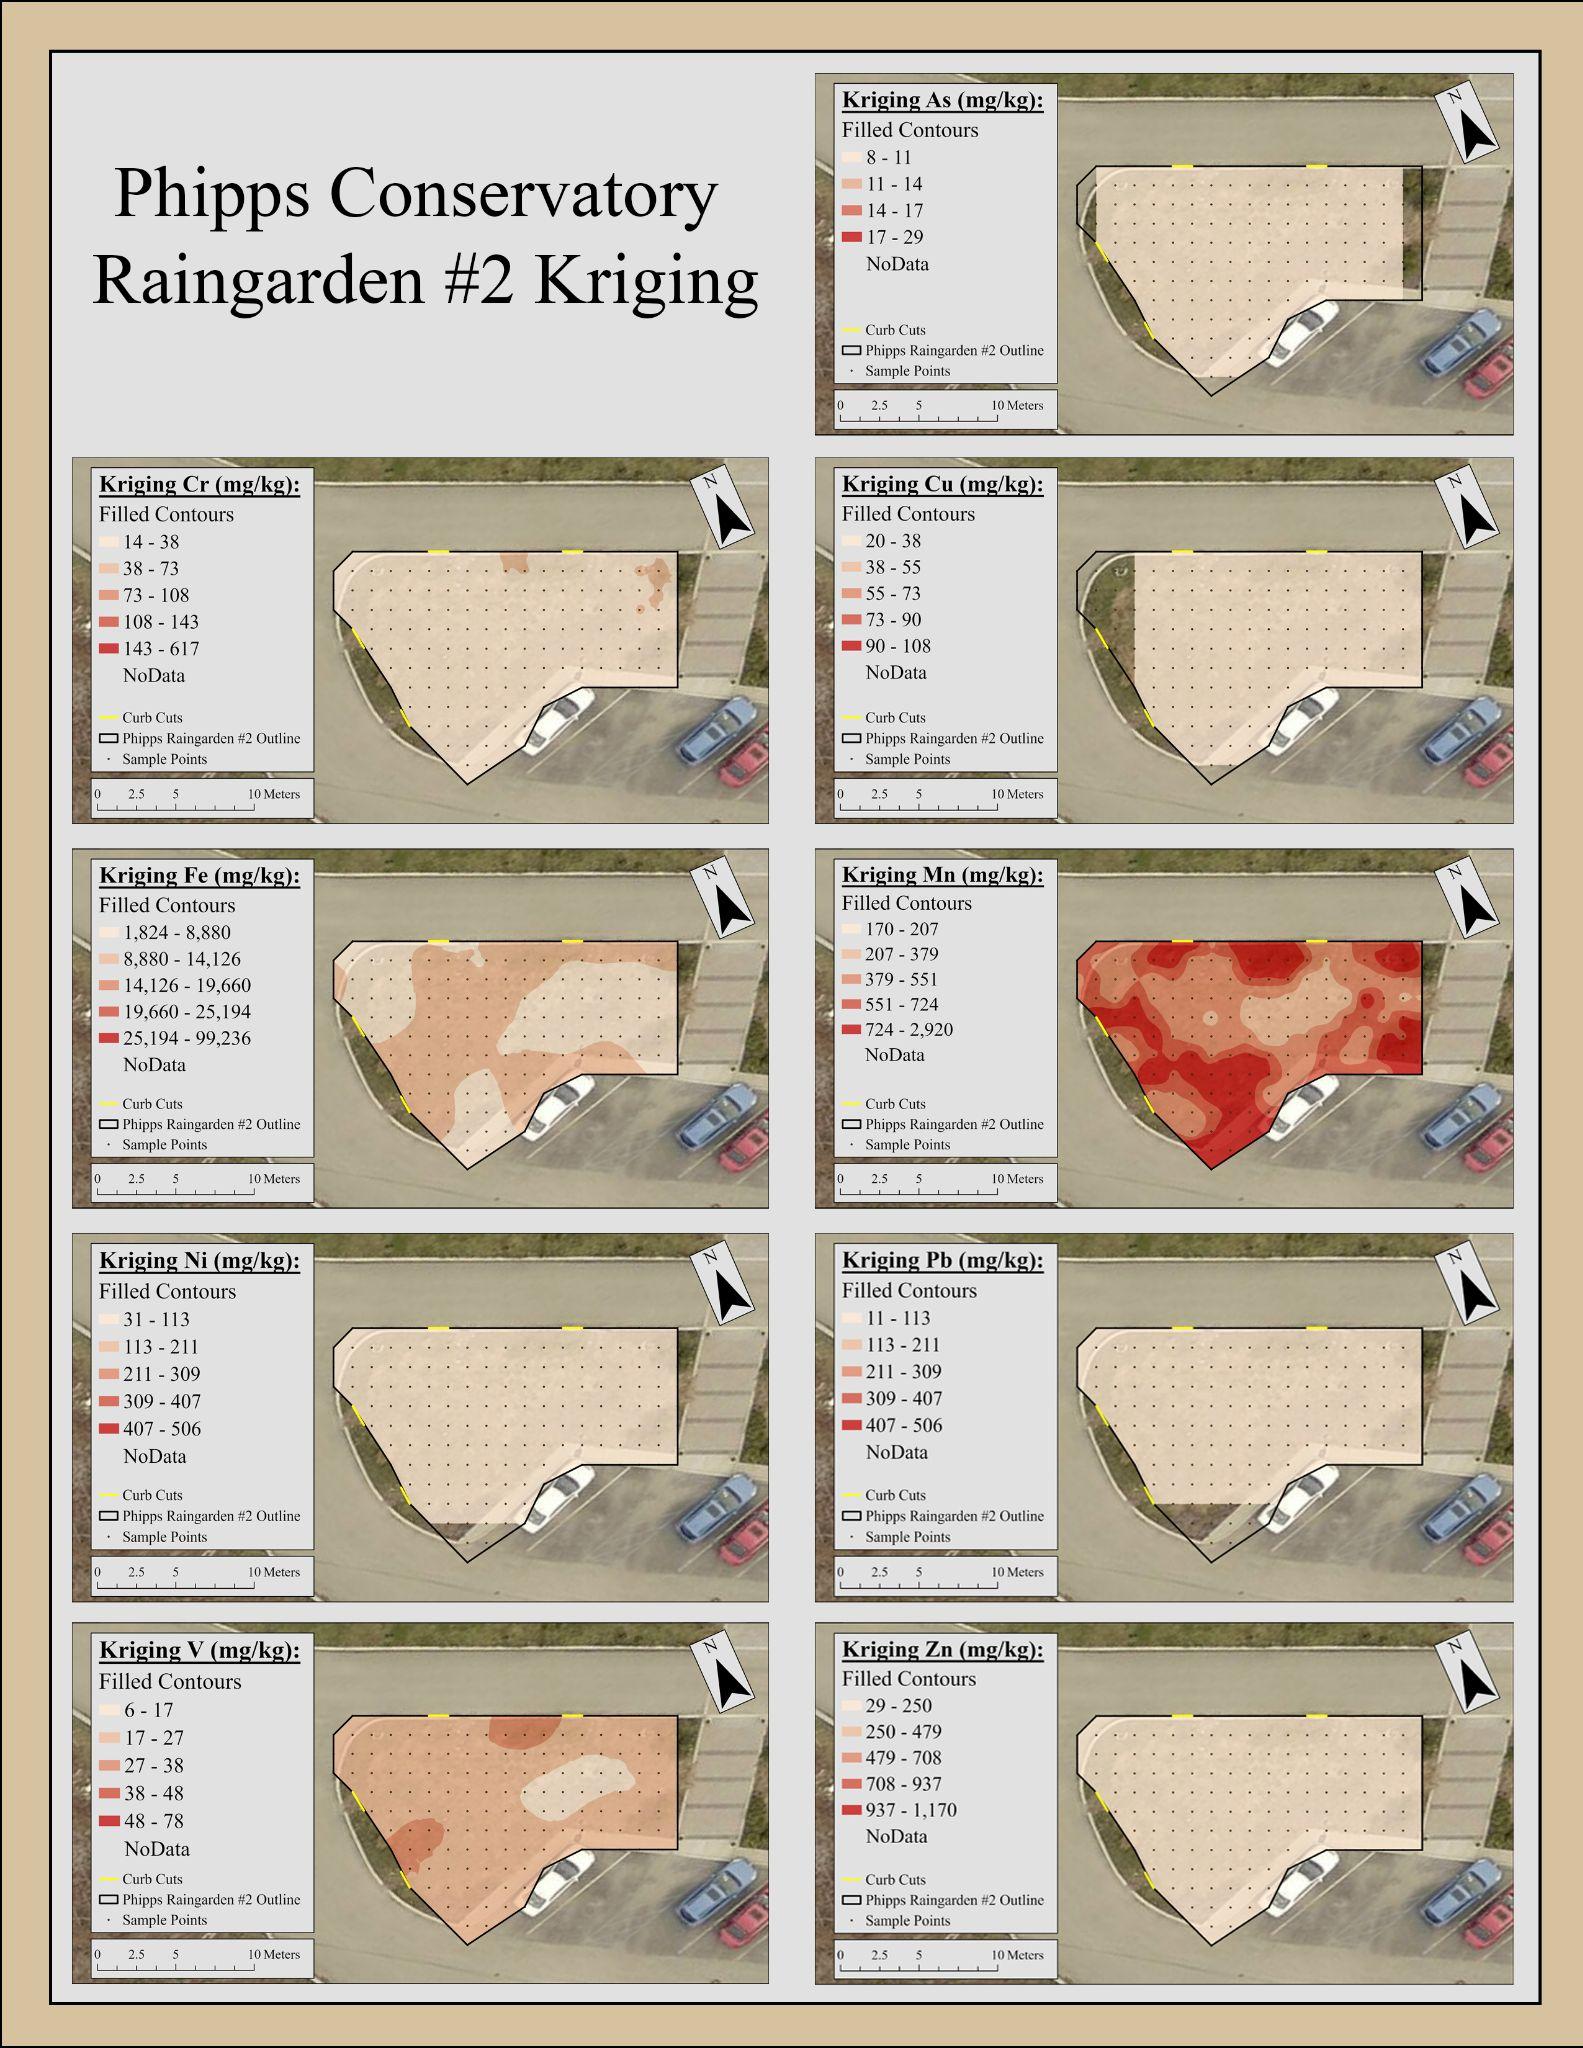
*

***Figure S5****: A map of soil metal concentration patterns measured in the Phipps Conservatory raingarden #2.*

*
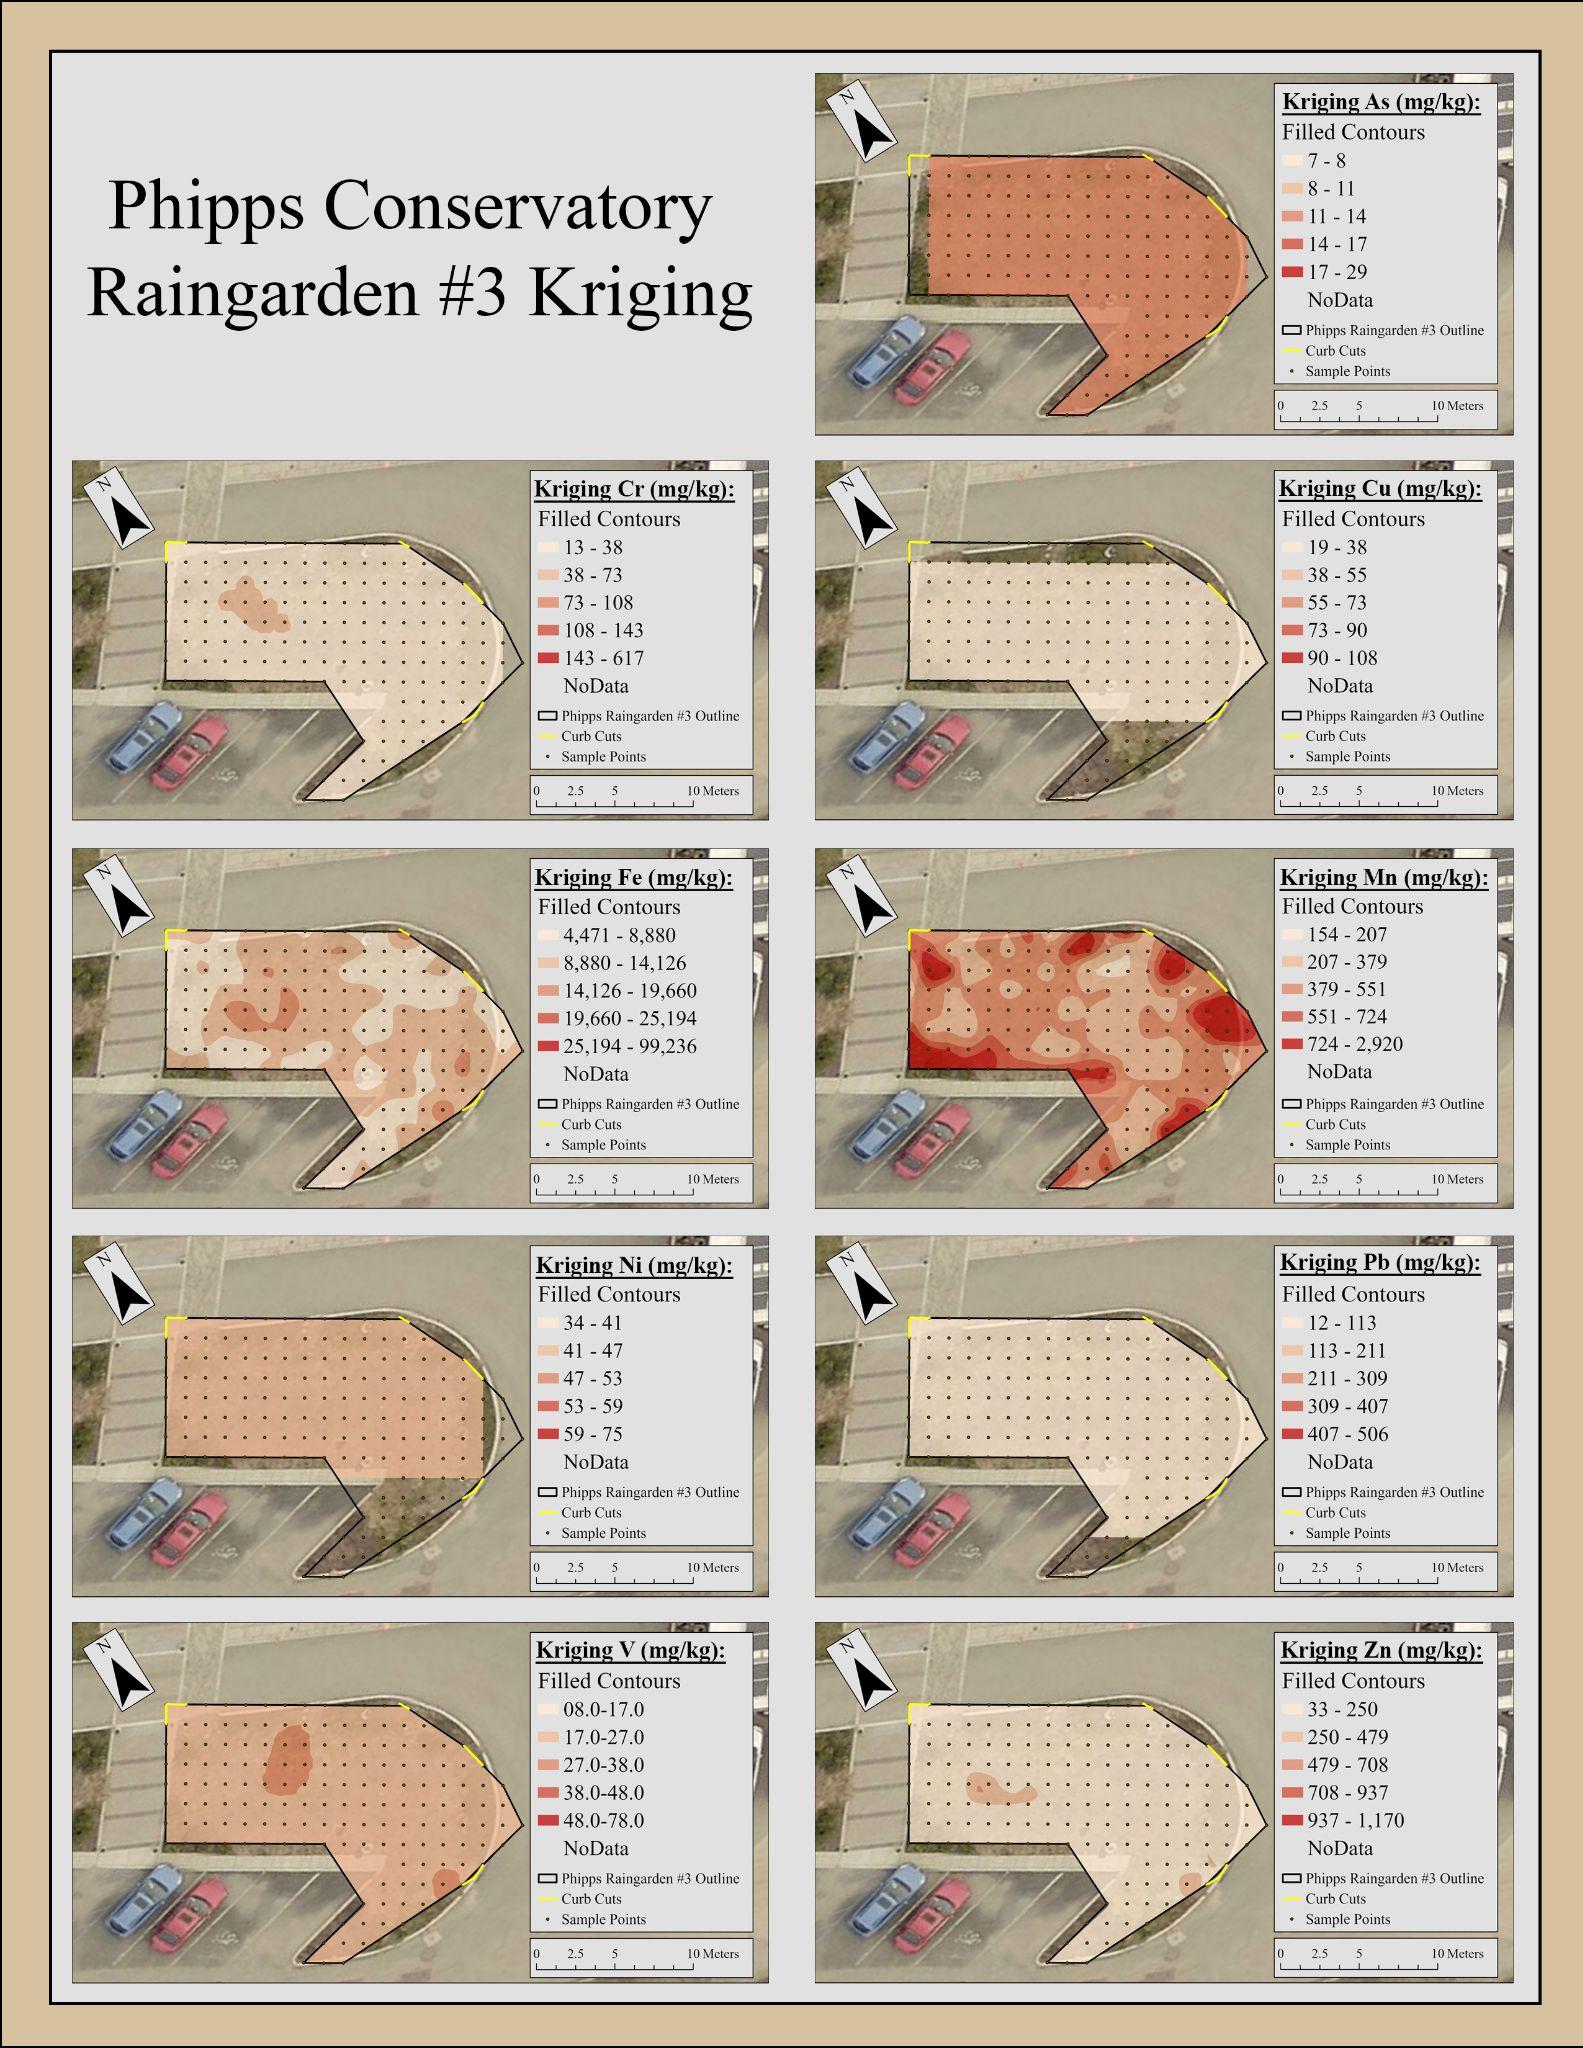
*

***Figure S6****: A map of soil metal concentration patterns measured in the Phipps Conservatory raingarden #3.*

*
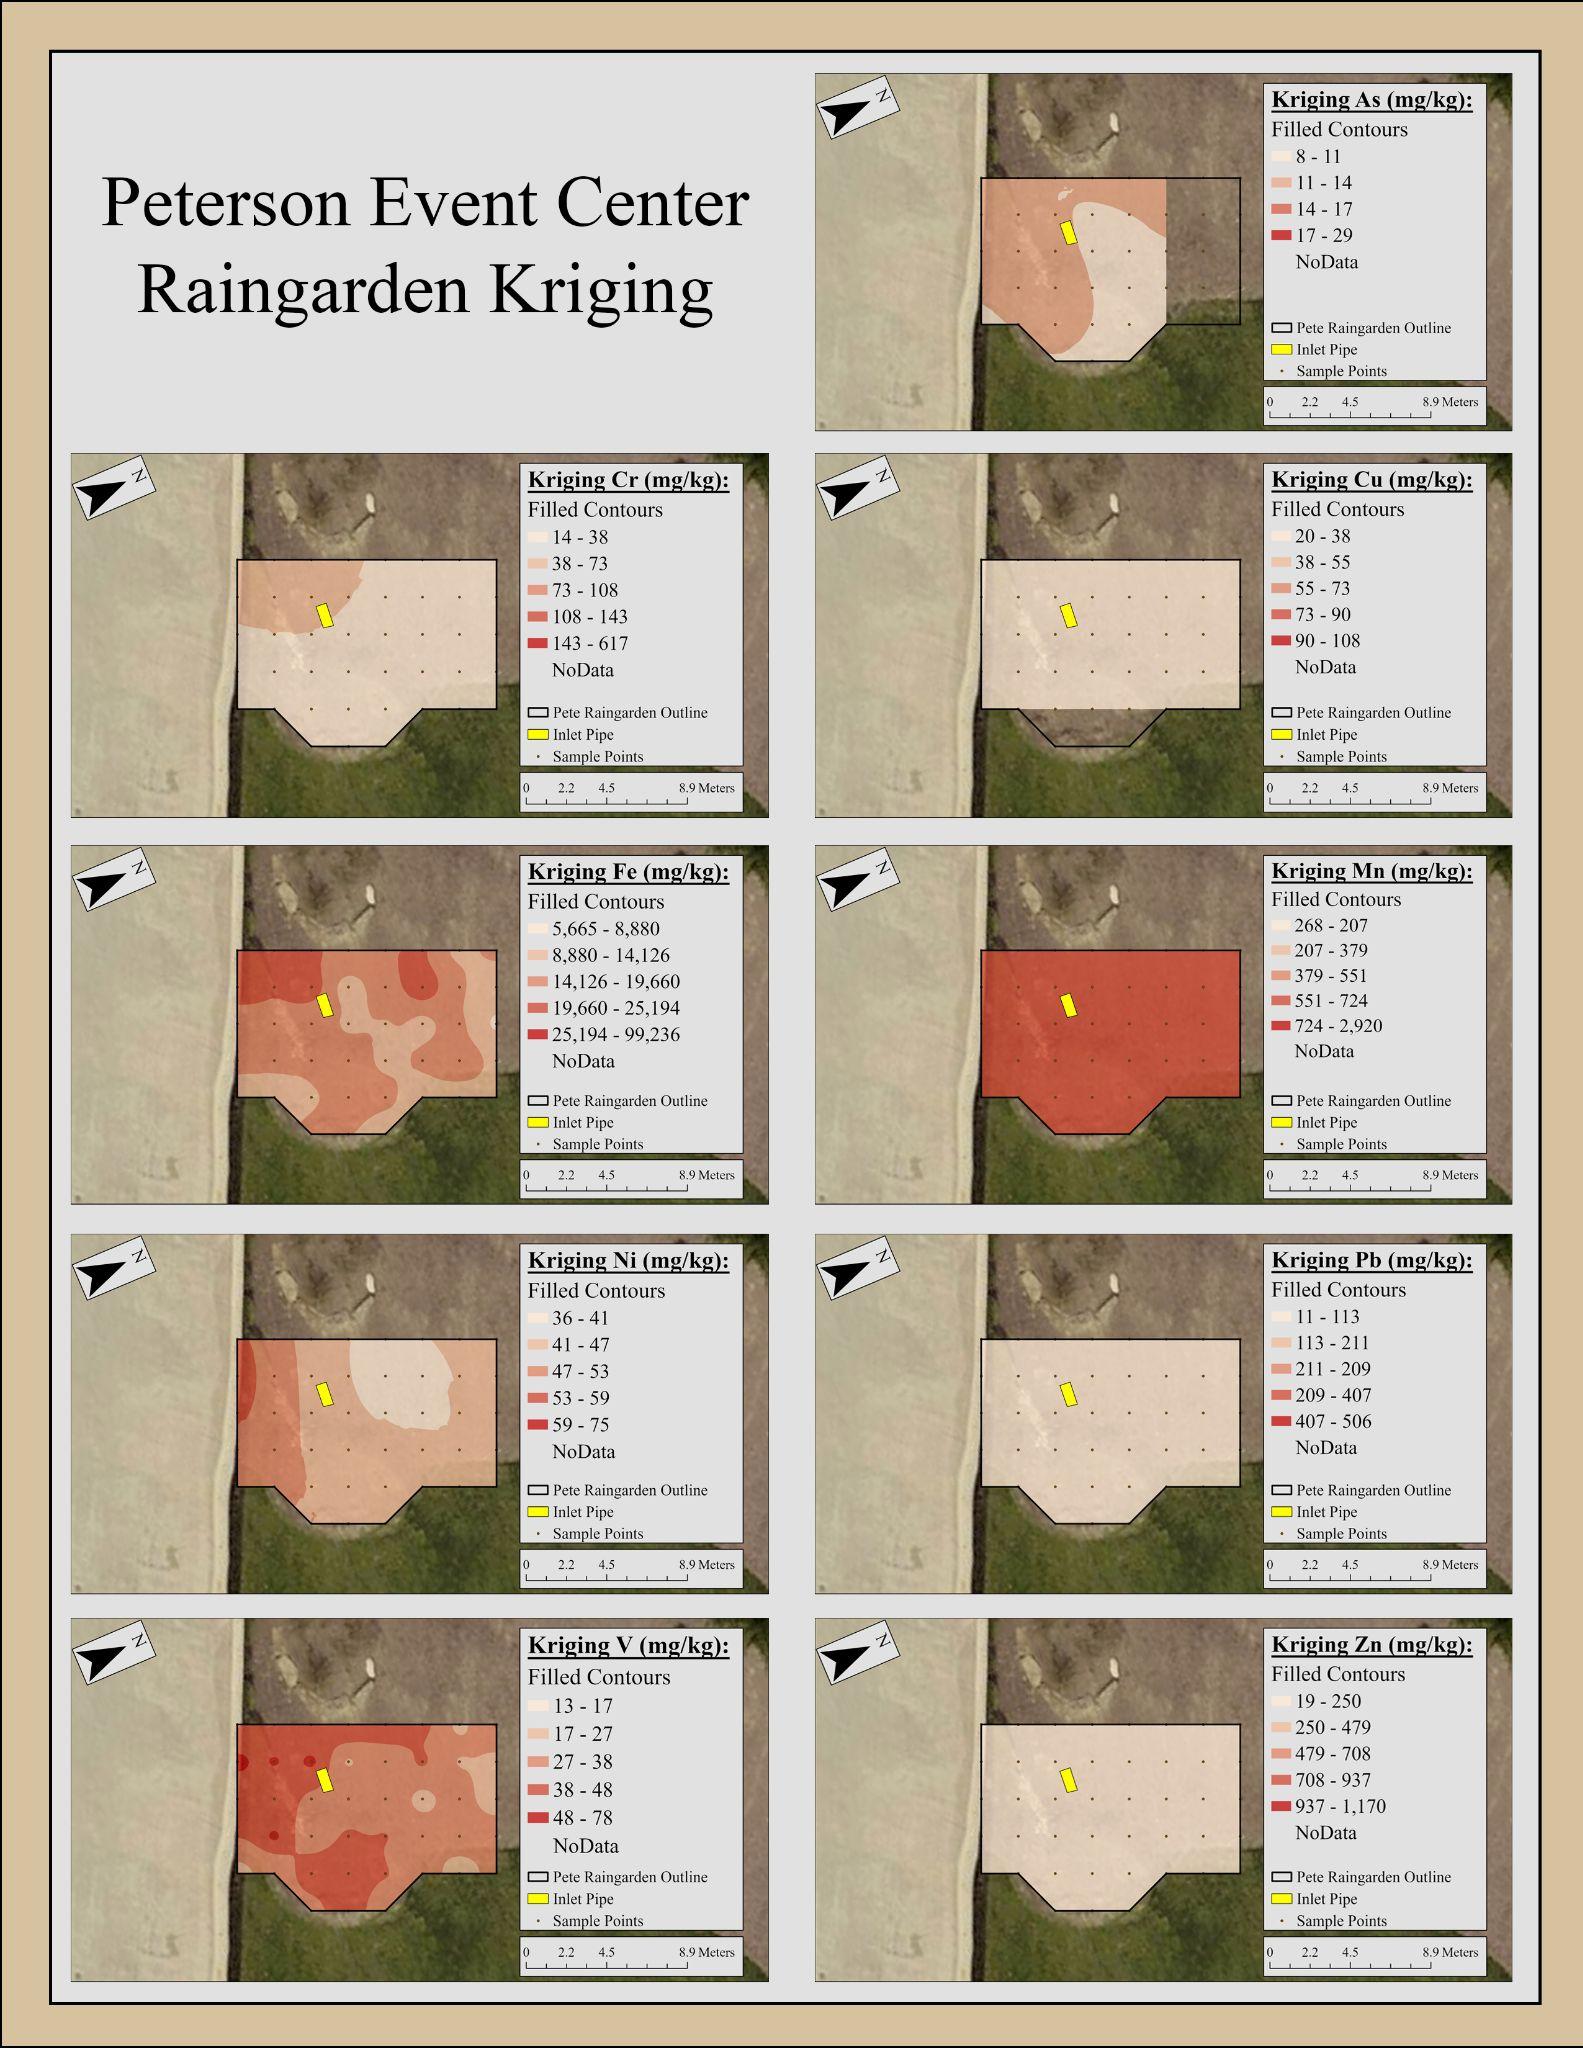
*

***Figure S7****: A map of soil metal concentration patterns measured in the Peterson Event Center raingarden.*

*
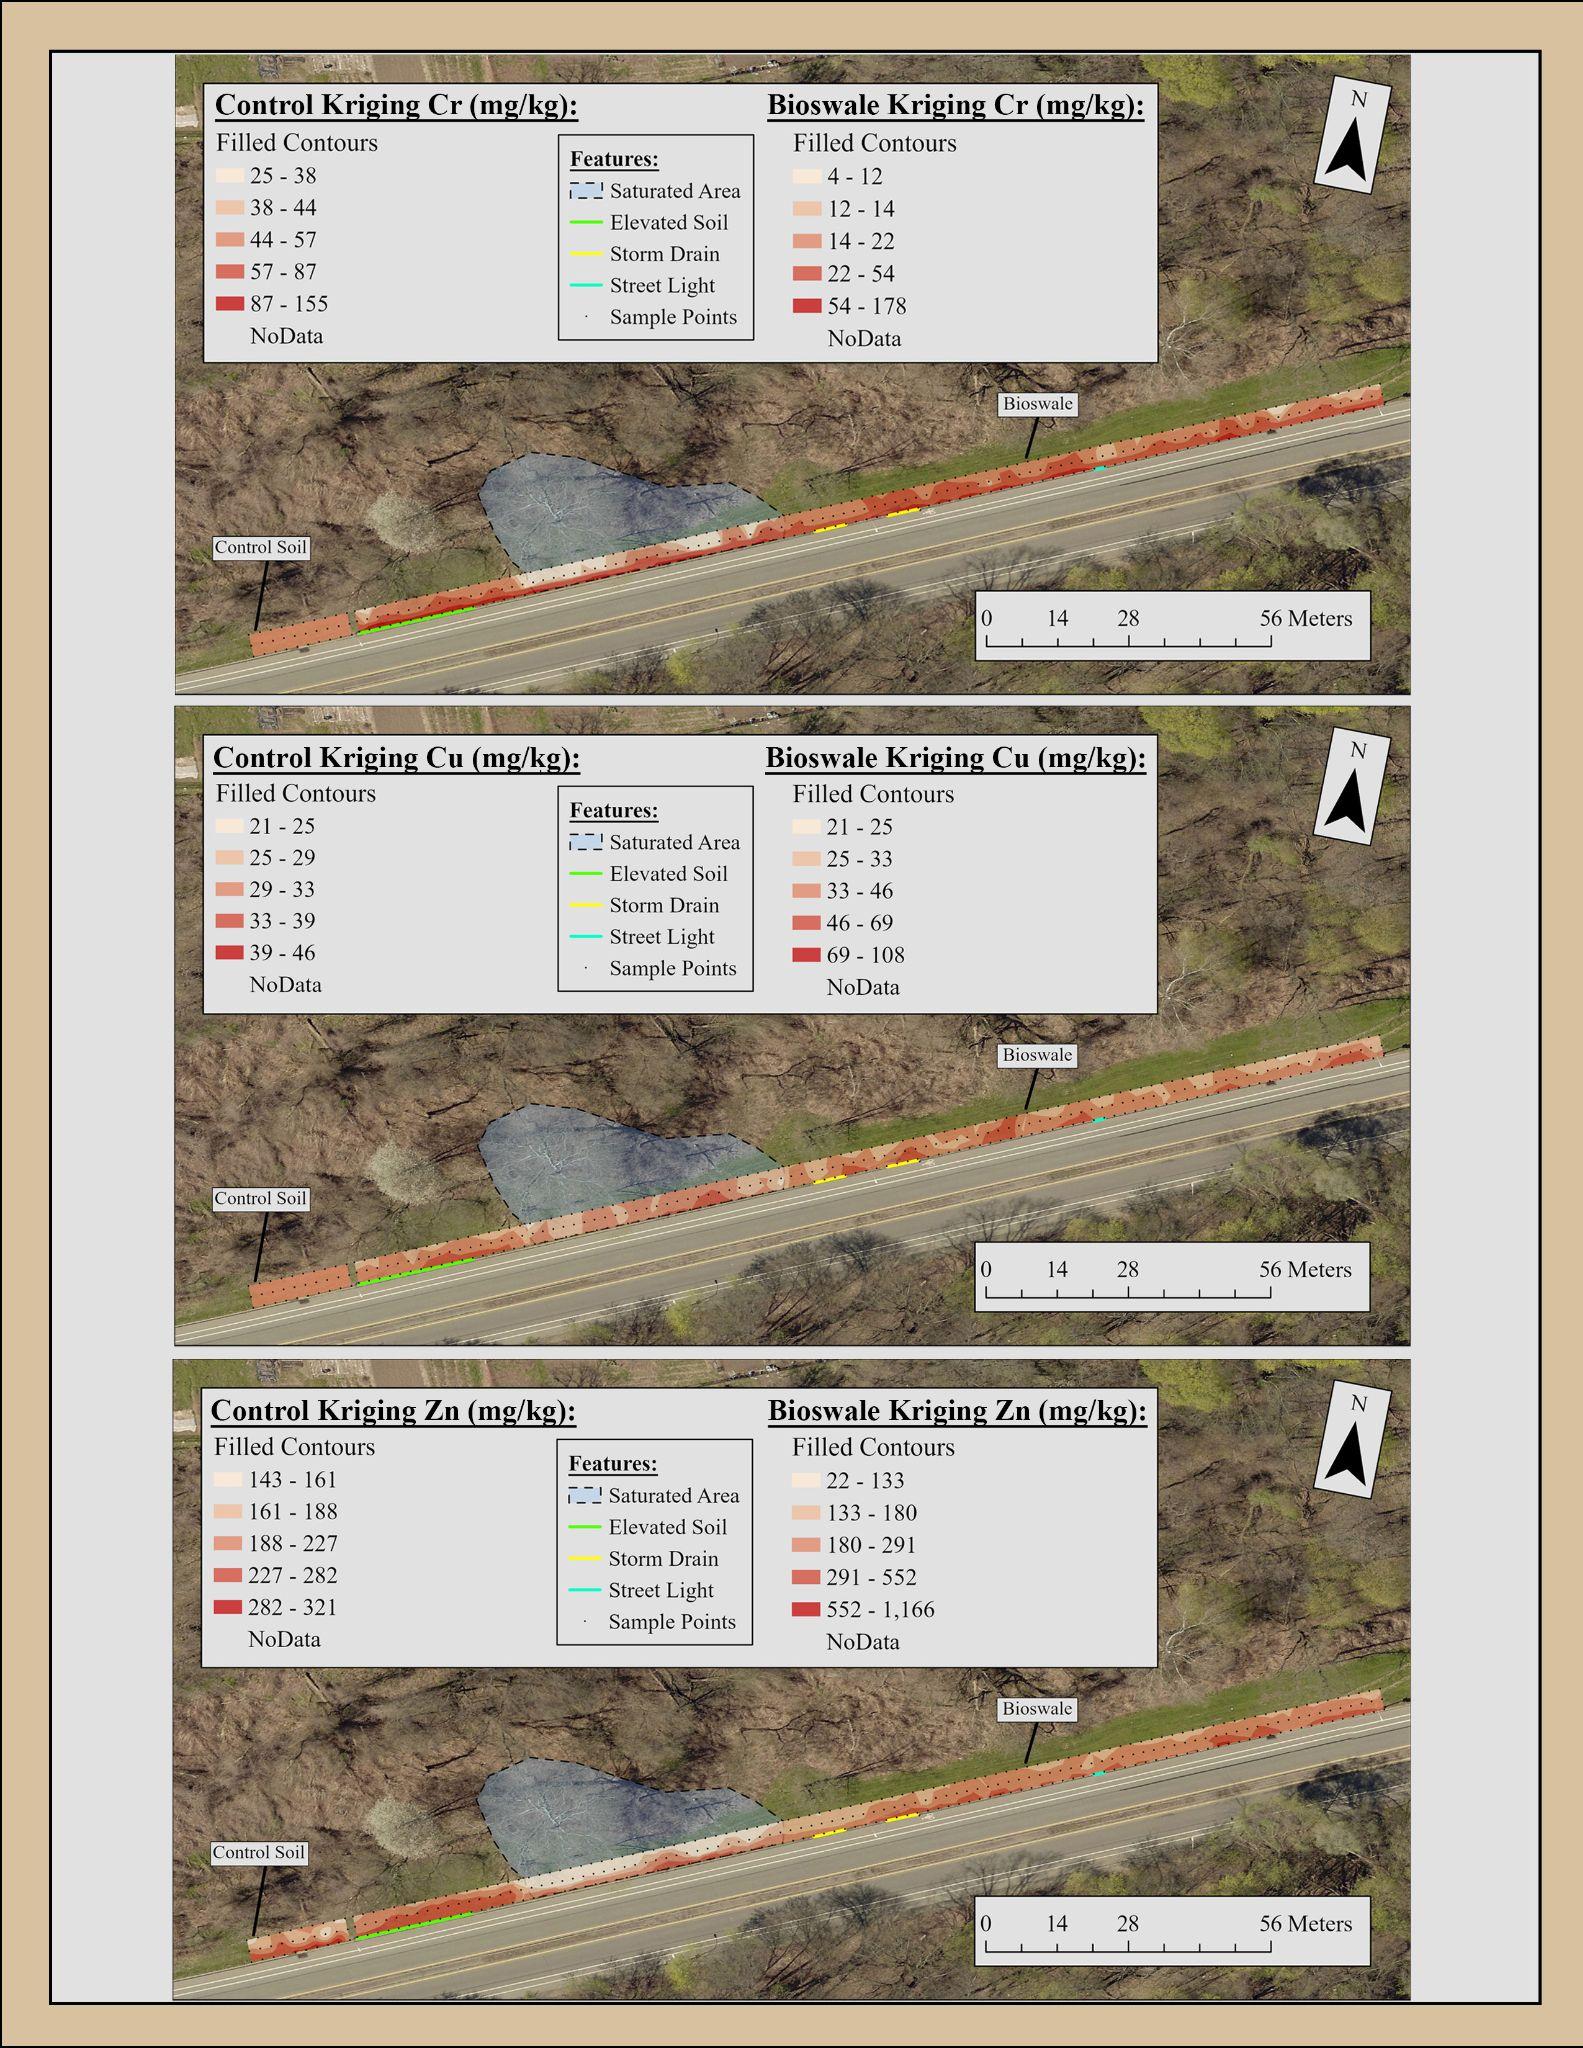
*

***Figure S8****: A map of Cr, Cu, and Zn soil metal concentration patterns measured in the Negley Run Blvd. bioswale. Note, the graduated color scale is optimized for comparison within the installation.*

*
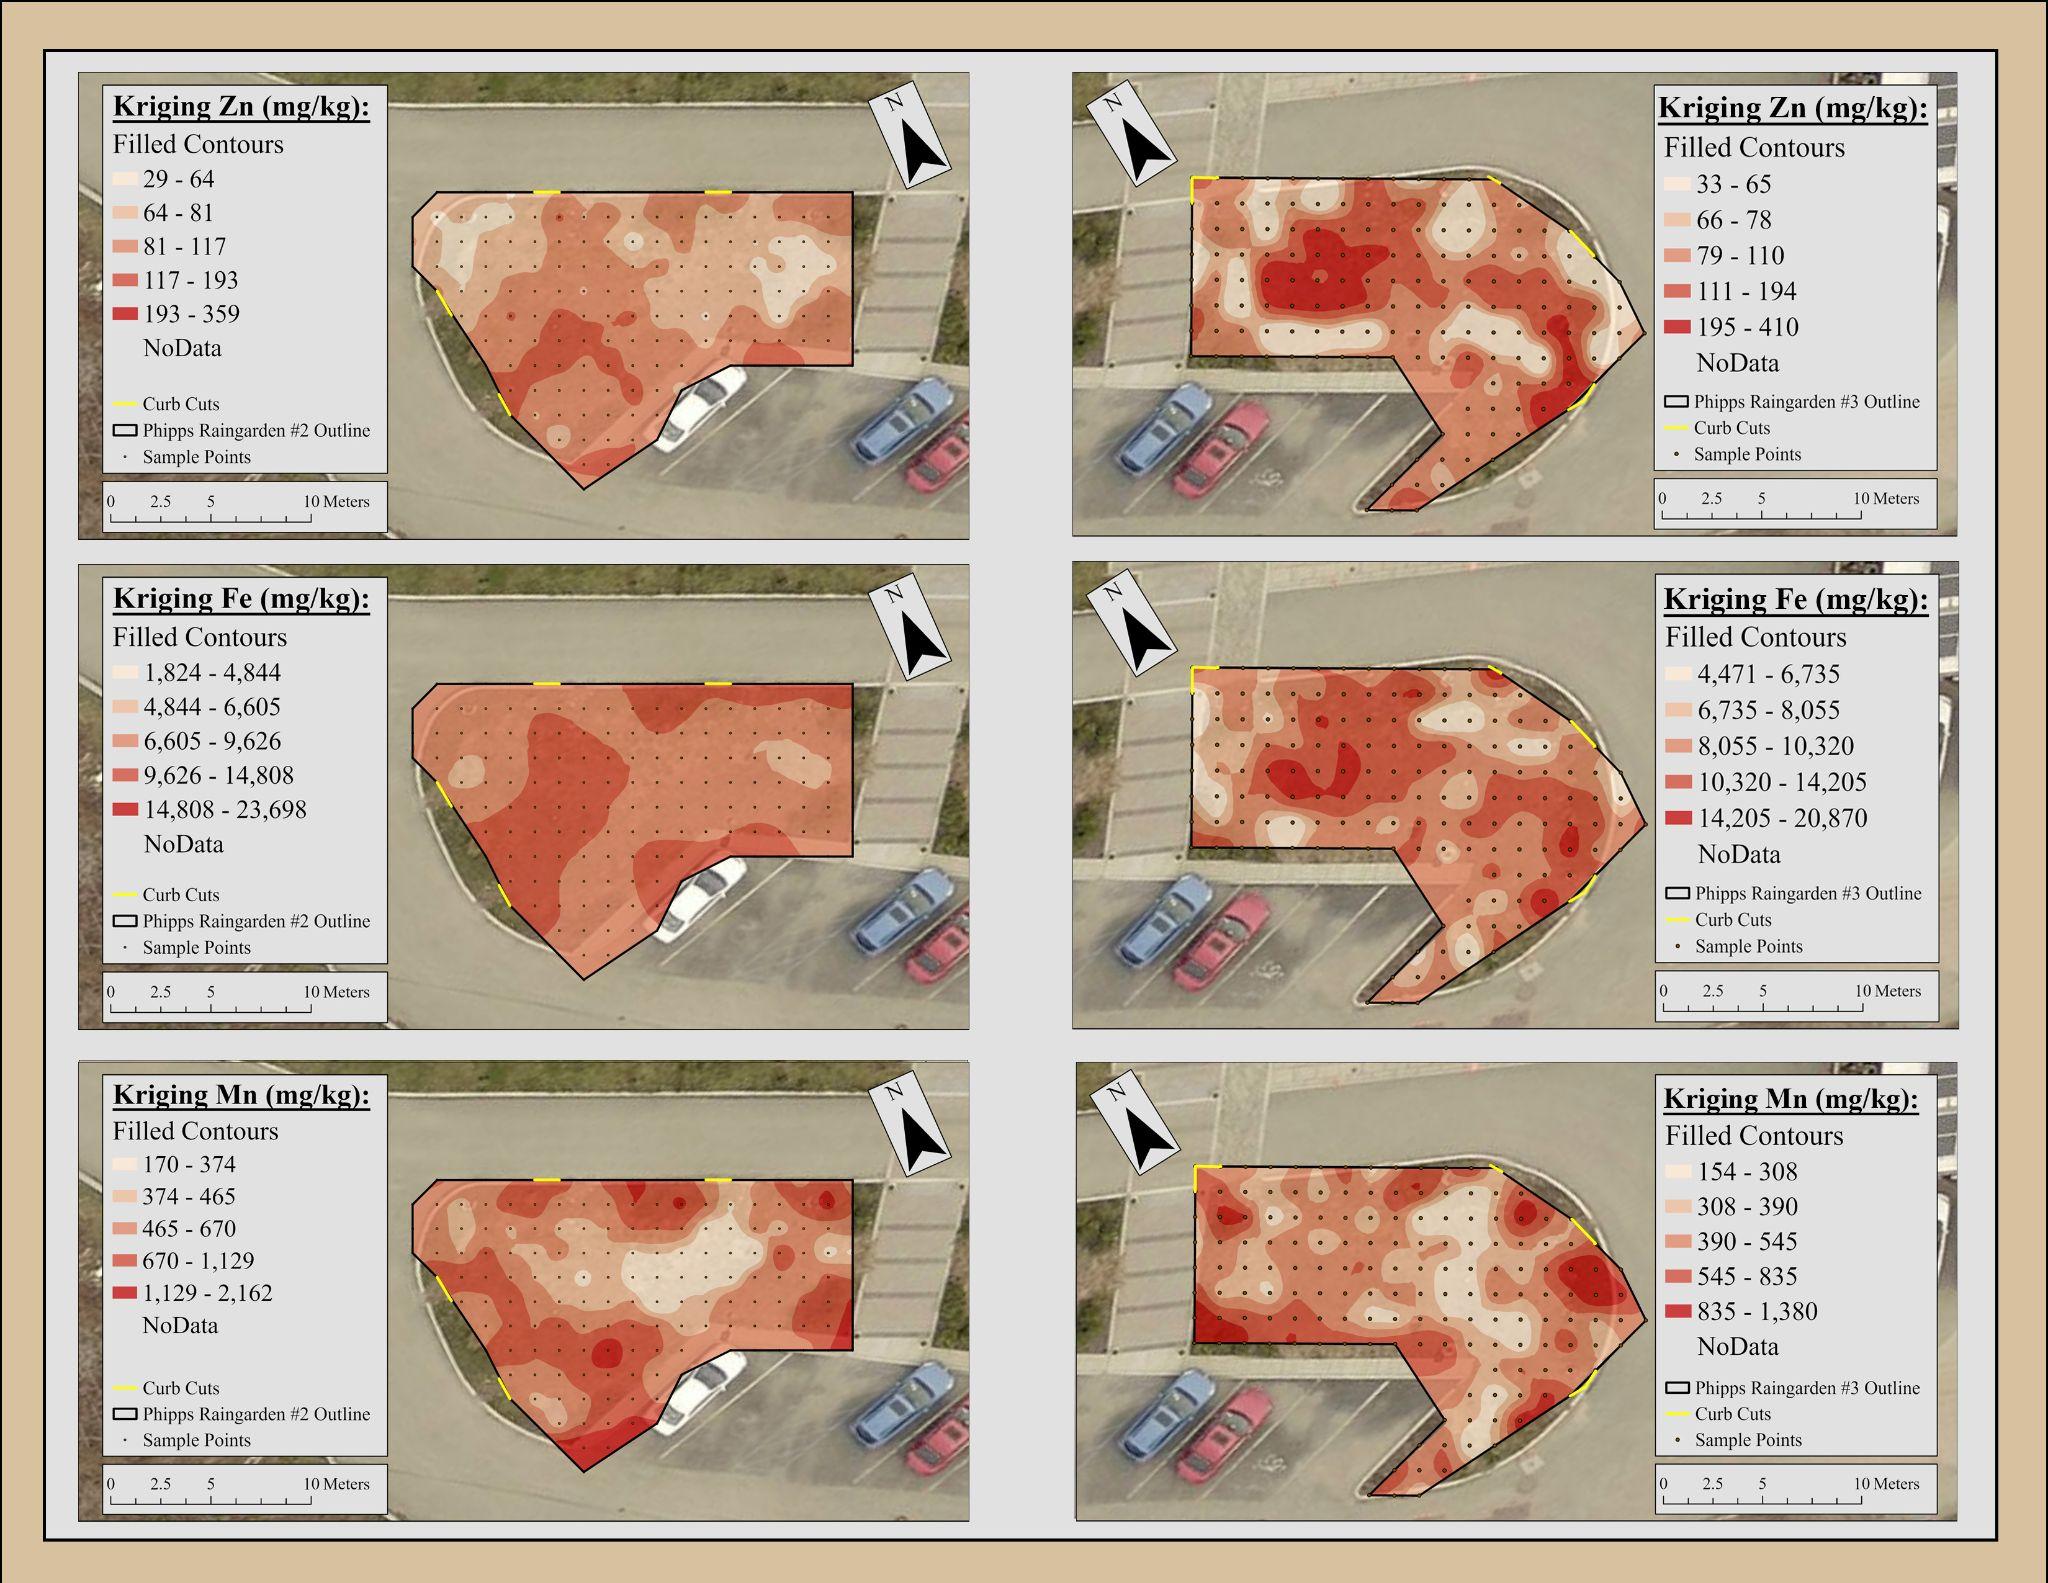
*

***Figure S9****: A map of Zn, Fe, and Mn sil metal concentration patterns measured in the Phipps Conservatory raingardens #2 (left) and #3 (right). Note, the graduated color scale is optimized for comparison within the installation.*
